# Supplementary material for: Cryochemical Production of Drug Nanoforms: Particle Size and Crystal Phase Control of the Antibacterial Medication 2,3-Quinoxalinedimethanol-1,4-dioxide (Dioxidine)
Source: MDPI journal article supplement (doi:10.3390/nano11061588), 2021-06-17
Supplement: s1 [file s1]

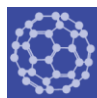

# Cryochemical Production of Drug Nanoforms: Particle Size and Crystal Phase Control of the Antibacterial Medication 2,3-Quinoxalinedimethanol-1,4-dioxide (Dioxidine)

Tatyana I. Shabatina <sup>1,2,\*</sup>, Yurii N. Morosov <sup>1,2</sup>, Andrey V. Soloviev <sup>1</sup>, Andrey V. Shabatin <sup>3</sup>, Olga I. Vernaya <sup>1</sup> and Michail Y. Melnikov <sup>1</sup>

<sup>1</sup> Department of Chemistry, M.V. Lomonosov Moscow State University, Leninskie Gori build 1/3, 119991 Moscow, Russian Federation; yunmor@mail.ru (Y.N.M.); andr\_solovyov@mail.ru (A.V.S.); olga\_vernaya@mail.ru (O.I.V.); melnikov46@mail.ru (M.Y.M.)

<sup>2</sup> Department of Chemistry, Faculty of Fundamental Sciences, Bauman Moscow State Technical University, 2nd Bauman Str. 5, 105905 Moscow, Russian Federation

<sup>3</sup> A.N. Frumkin Institute of Physical Chemistry and Electrochemistry RAS, Lenin Prospect, 31 build. 4; 119071 Moscow, Russian Federation, 5dr.on5@mail.ru (A.V.Sh)

\* Correspondence: tatyashabatina@yandex.ru or tsh@kinet.chem.msu.ru; Tel./Fax: +07-495-939-5442

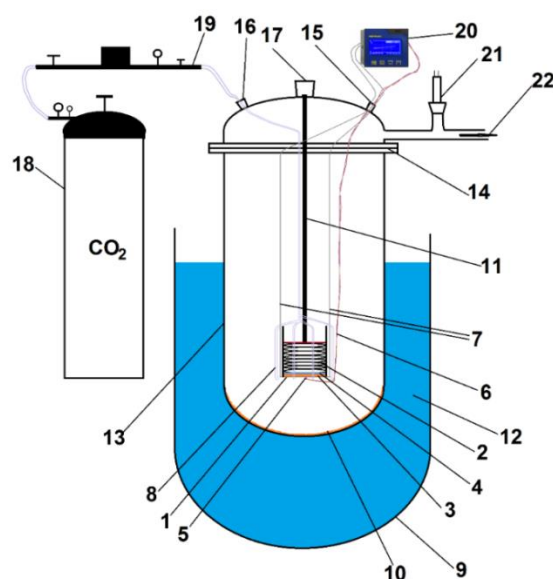

**Figure S1.** The scheme of the original cryostat for the cryochemical synthesis using combination of sublimation of dioxidine drug and joint low-temperature condensation of its molecular beam with the flow of inert gas-carrier: 1 - a metal grid heated by electric current flowing through it; 2 - spring that presses the layer of the original drugs to the metal grid; 3 - a layer of the original drug substances pressed against a metal grid; 4 - a rod that serves for evenly pressing the layer of the initial drugs to the metal grid; 5 - junction of a thermocouple used for measuring the temperature of a metal grid; 6 - copper - constantan thermocouple designed for measuring the temperature of a metal grid; 7 - network wires connected to a metal grid; 8 - comb designed for uniform distribution of the flow of carrier gas-CO<sub>2</sub>; 9 - Dewar vessel with liquid nitrogen; 10 - layer of a mixture of a cryomodified drugs with solid carbon dioxide; 11 - pin that regulates the position of the sublimator in the height of the submerged reactor; 12 - liquid nitrogen; 13 - vacuum-operated submersible reactor; 14 - movable vacuum connection; 15 - vacuum input for thermocouple and network wires; 16 - vacuum inlet for CO<sub>2</sub> carrier gas flow; 17 - vacuum input for dioxide; 19 - gas main (gas flow regulator); 20 - temperature controller; 21 - vacuum sensor; 22 - access to the vacuum system the pin that regulates the position of the sublimator in the height of the submerged reactor; 18 - metal cylinder with carbon.

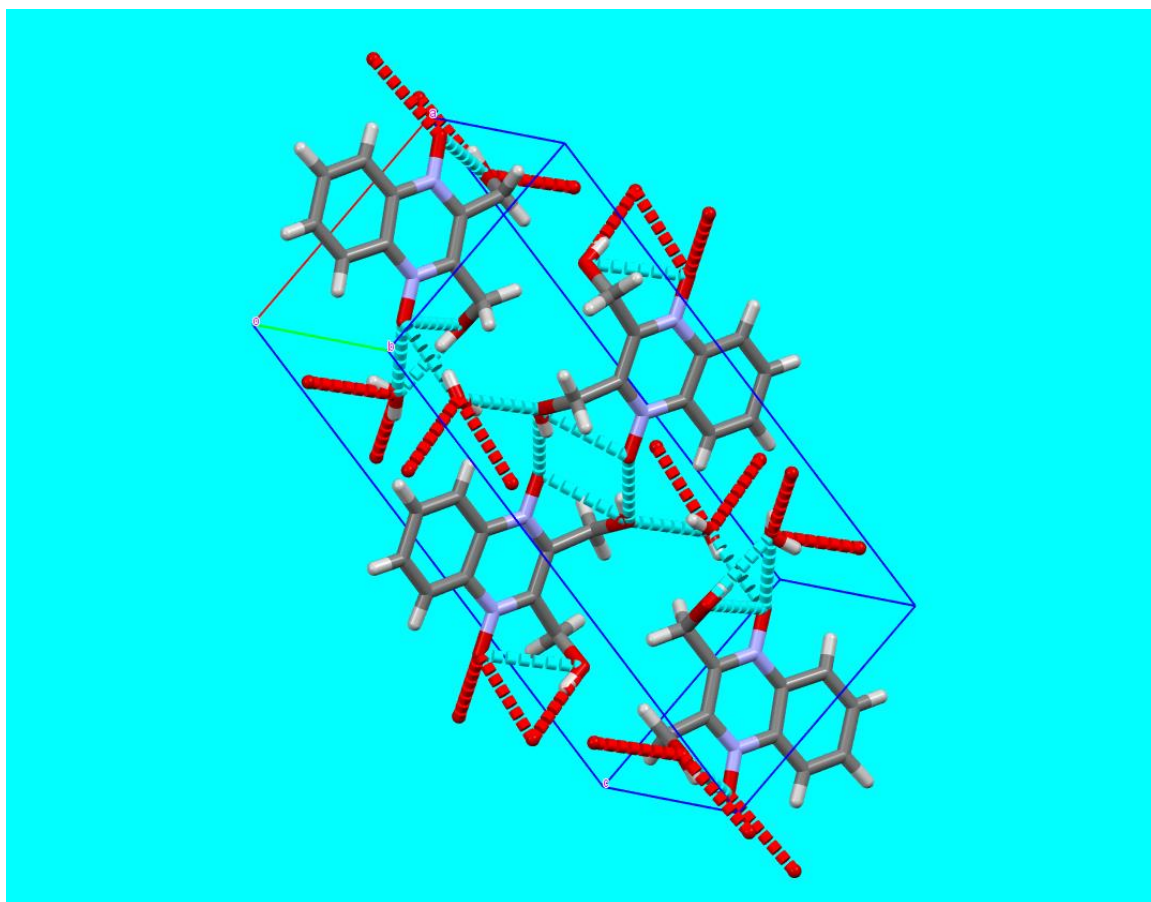

**Figure S2.** Fragment of the crystal lattice of dioxidine monohydrate (SOKGAA).

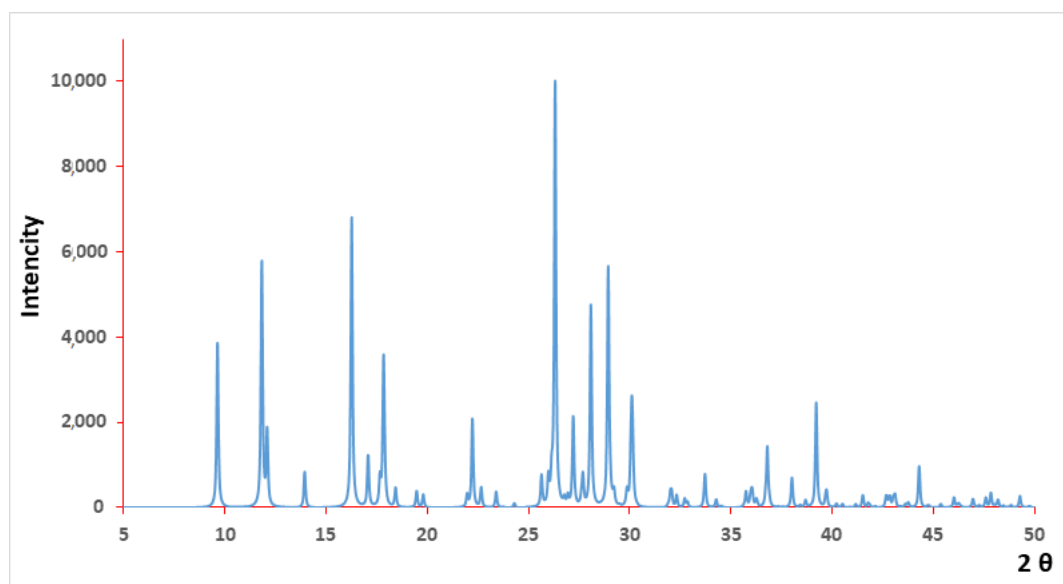

**Figure S3.** Simulated X-ray diffraction pattern of dioxidine monohydrate (SOKGAA) [40].

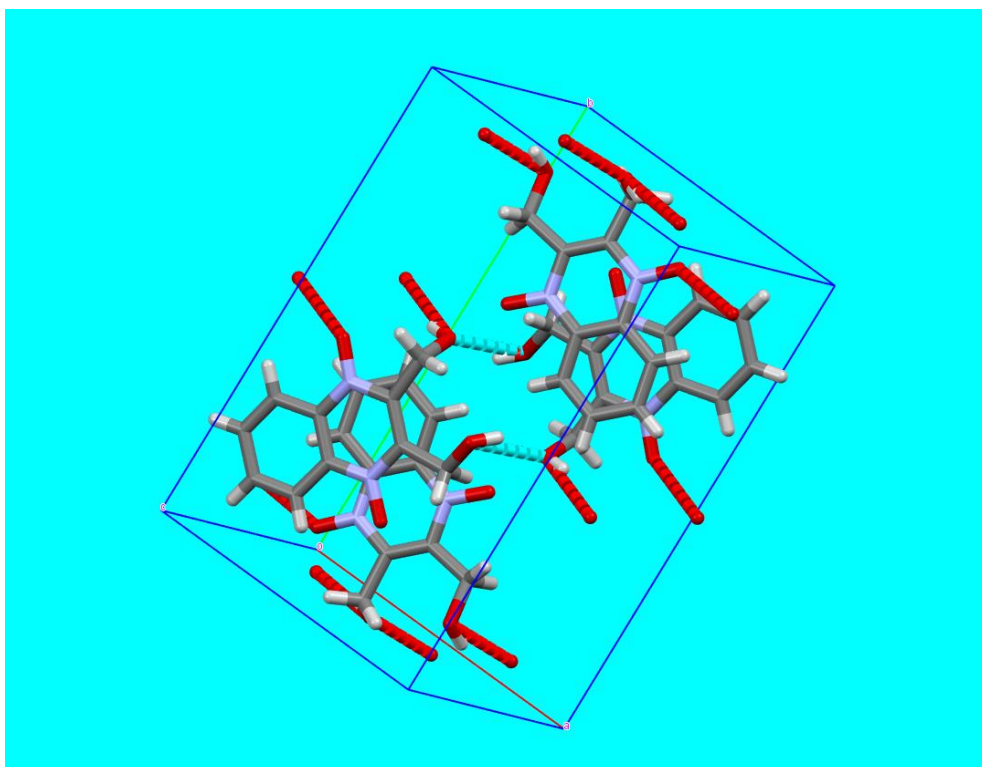

**Figure S4.** Fragment of the crystal lattice of monoclinic dioxidine polymorph (M).

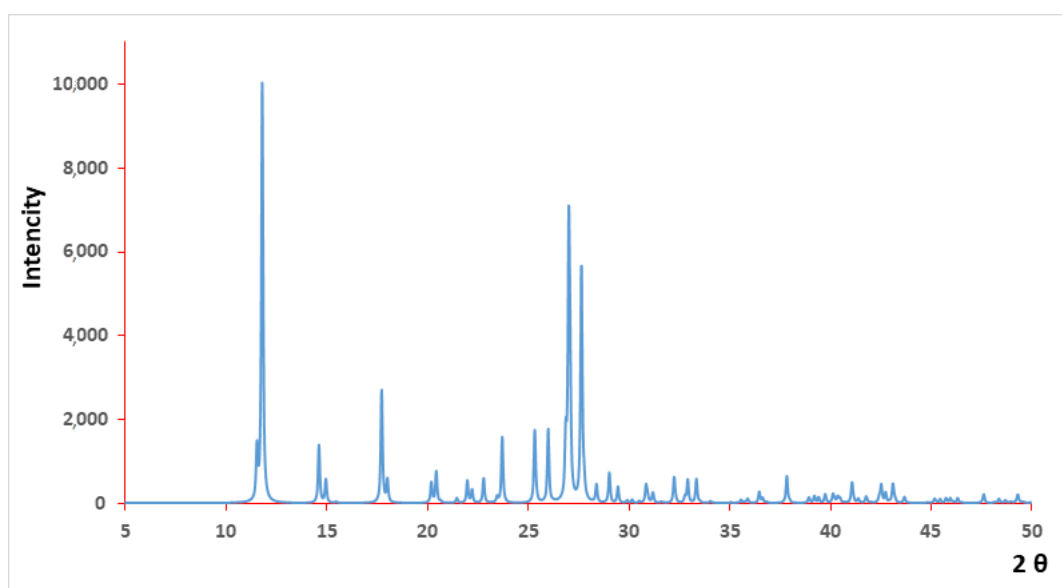

**Figure S5.** Simulated X-ray diffraction pattern of monoclinic dioxidine polymorph (M) [39].

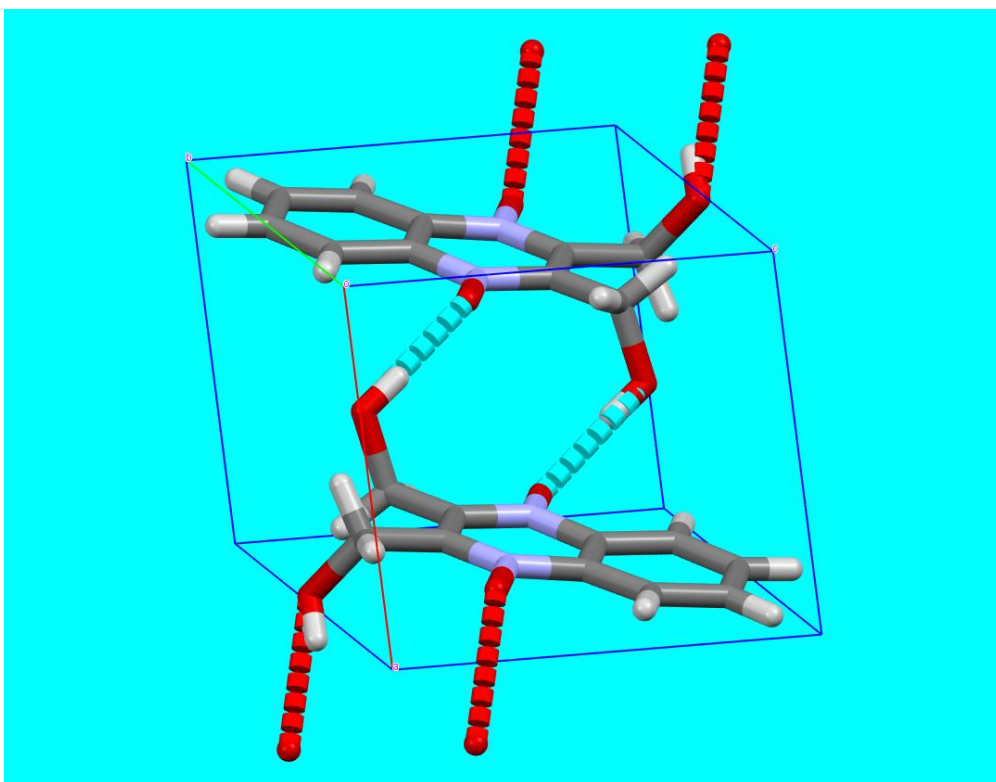

**Figure S6.** Fragment of the crystal lattice of triclinic dioxidine polymorph (T).

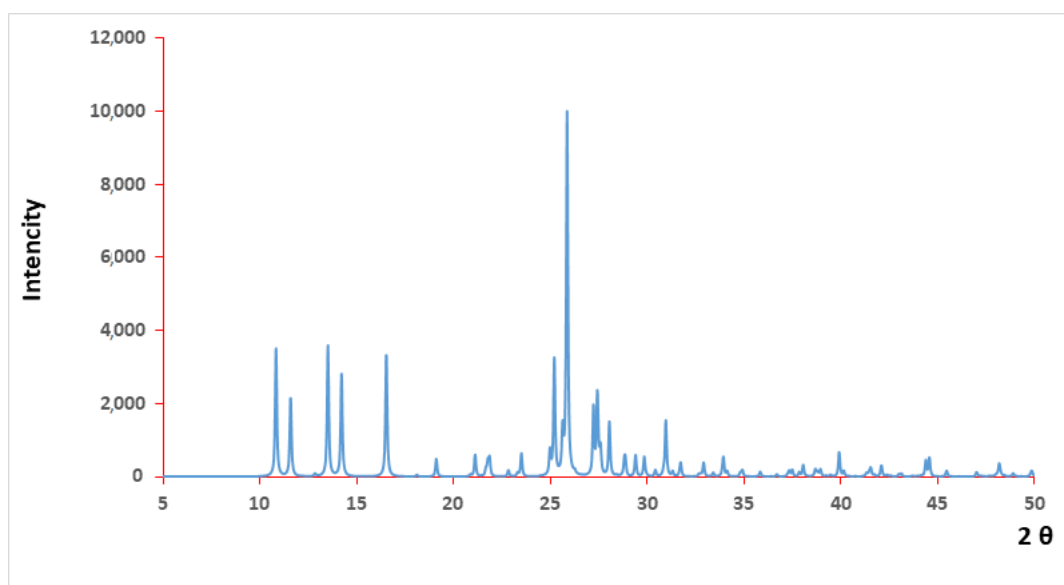

**Figure S7.** Simulated X-ray diffraction pattern of triclinic dioxidine polymorph (T) [39].

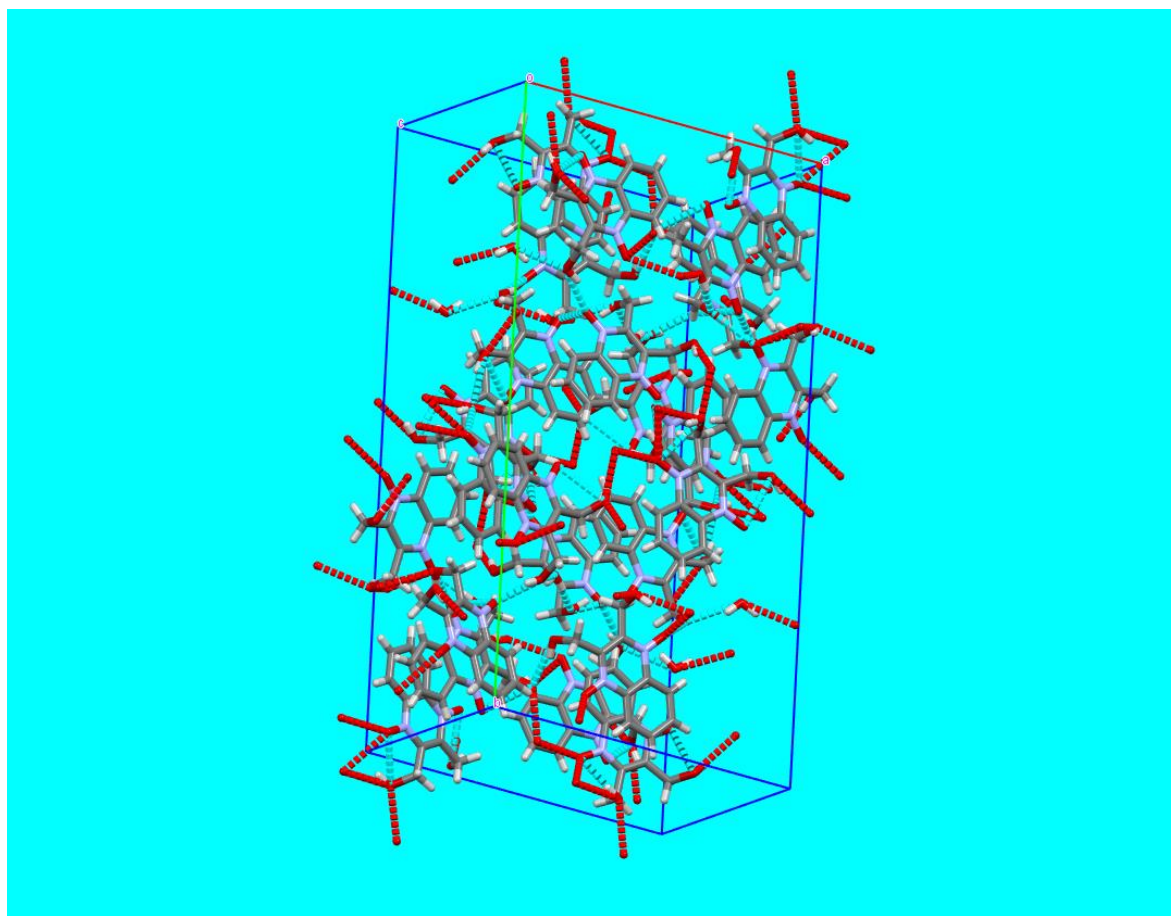

Figure S8. Fragment of the crystal lattice of 1/3 dioxidine hydrate (H).

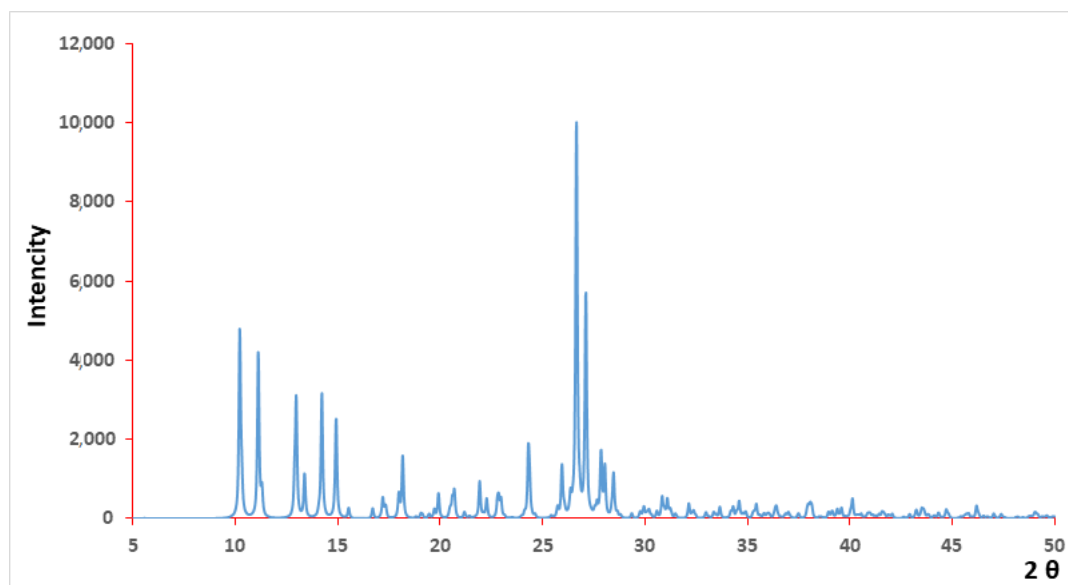

Figure S9. Simulated X-ray diffraction pattern of 1/3 dioxidine hydrate (H) [39].

**Table S1.** Zones of bacteria strains growth inhibition (ZOI) for compressed tablets of initial pharmacopoeia dioxidine and dioxidine obtained at a maximum carrier gas flow  $-6,97 \times 10^{17} \text{ molecules} \cdot \text{s}^{-1} \cdot \text{cm}^{-2}$ , results were obtained by a nine-fold repetition measurements of zones of inhibition (ZOI) of bacterial strains growth for each series of samples.

| Bacteria Strains     | Drug Substance                                                                                                                                  | ZOI (mm) | Mean (mm) | Standard Deviation (mm) | p-Value              |
|----------------------|-------------------------------------------------------------------------------------------------------------------------------------------------|----------|-----------|-------------------------|----------------------|
| <i>E coli 52</i>     | Pharmacopoeia dioxidine                                                                                                                         | 32       | 32.7      | 1.0                     | 5.7×10 <sup>-8</sup> |
|                      |                                                                                                                                                 | 33       |           |                         |                      |
|                      |                                                                                                                                                 | 31       |           |                         |                      |
|                      |                                                                                                                                                 | 34       |           |                         |                      |
|                      |                                                                                                                                                 | 33       |           |                         |                      |
|                      |                                                                                                                                                 | 32       |           |                         |                      |
|                      |                                                                                                                                                 | 34       |           |                         |                      |
|                      |                                                                                                                                                 | 33       |           |                         |                      |
|                      |                                                                                                                                                 | 32       |           |                         |                      |
|                      | Cryomodified Dioxidine obtained at a maximal carrier gas CO <sub>2</sub> flow (7*10 <sup>17</sup> molecules*s <sup>-1</sup> *cm <sup>-2</sup> ) | 39       | 37.7      | 1.2                     |                      |
|                      |                                                                                                                                                 | 35       |           |                         |                      |
|                      |                                                                                                                                                 | 37       |           |                         |                      |
|                      |                                                                                                                                                 | 39       |           |                         |                      |
|                      |                                                                                                                                                 | 38       |           |                         |                      |
|                      |                                                                                                                                                 | 38       |           |                         |                      |
|                      |                                                                                                                                                 | 37       |           |                         |                      |
|                      |                                                                                                                                                 | 38       |           |                         |                      |
|                      |                                                                                                                                                 | 38       |           |                         |                      |
| <i>S. aureus 144</i> | Pharmacopoeia dioxidine                                                                                                                         | 29       | 30.3      | 0.9                     |                      |
|                      |                                                                                                                                                 | 30       |           |                         |                      |
|                      |                                                                                                                                                 | 30       |           |                         |                      |
|                      |                                                                                                                                                 | 32       |           |                         |                      |
|                      |                                                                                                                                                 | 30       |           |                         |                      |
|                      |                                                                                                                                                 | 30       |           |                         |                      |
|                      |                                                                                                                                                 | 30       |           |                         |                      |
|                      |                                                                                                                                                 | 31       |           |                         |                      |
|                      |                                                                                                                                                 | 31       |           |                         |                      |
|                      | Cryomodified Dioxidine obtained at a maximal carrier gas CO <sub>2</sub> flow (7*10 <sup>17</sup> molecules*s <sup>-1</sup> *cm <sup>-2</sup> ) | 32       | 31.7      | 1.0                     |                      |
|                      |                                                                                                                                                 | 31       |           |                         |                      |
|                      |                                                                                                                                                 | 31       |           |                         |                      |
|                      |                                                                                                                                                 | 31       |           |                         |                      |
|                      |                                                                                                                                                 | 32       |           |                         |                      |
|                      |                                                                                                                                                 | 30       |           |                         |                      |
|                      |                                                                                                                                                 | 33       |           |                         |                      |
|                      |                                                                                                                                                 | 32       |           |                         |                      |
|                      |                                                                                                                                                 | 33       |           |                         |                      |

| Strain               | Condition                                                                                                                                       | Retention Time (min) | Peak Area | Peak Height |
|----------------------|-------------------------------------------------------------------------------------------------------------------------------------------------|----------------------|-----------|-------------|
| <i>M. cyaneum</i> 98 | Pharmacopoeia dioxidine                                                                                                                         | 26                   | 26.0      | 0.9         |
|                      |                                                                                                                                                 | 25                   |           |             |
|                      |                                                                                                                                                 | 25                   |           |             |
|                      |                                                                                                                                                 | 27                   |           |             |
|                      |                                                                                                                                                 | 27                   |           |             |
|                      | Cryomodified Dioxidine obtained at a maximal carrier gas CO <sub>2</sub> flow (7*10 <sup>17</sup> molecules*s <sup>-1</sup> *cm <sup>-2</sup> ) | 26                   | 36.3      | 1.2         |
|                      |                                                                                                                                                 | 25                   |           |             |
|                      |                                                                                                                                                 | 26                   |           |             |
|                      |                                                                                                                                                 | 25                   |           |             |
|                      |                                                                                                                                                 | 26                   |           |             |
| <i>B. cereus</i> 9   | Pharmacopoeia dioxidine                                                                                                                         | 30                   | 29.3      | 1.0         |
|                      |                                                                                                                                                 | 31                   |           |             |
|                      |                                                                                                                                                 | 30                   |           |             |
|                      |                                                                                                                                                 | 29                   |           |             |
|                      |                                                                                                                                                 | 29                   |           |             |
|                      | Cryomodified Dioxidine obtained at a maximal carrier gas CO <sub>2</sub> flow (7*10 <sup>17</sup> molecules*s <sup>-1</sup> *cm <sup>-2</sup> ) | 28                   | 31.0      | 1.0         |
|                      |                                                                                                                                                 | 29                   |           |             |
|                      |                                                                                                                                                 | 28                   |           |             |
|                      |                                                                                                                                                 | 30                   |           |             |
|                      |                                                                                                                                                 | 29                   |           |             |
